# Supplementary material for: Low-Protein Diets Differentially Regulate Energy Balance during Thermoneutral and Heat Stress in Cobb Broiler Chicken (Gallus domesticus)
Source: MDPI journal article supplement (doi:10.3390/ijms25084369), 2024-04-15
Supplement: s1 [file s1]

## Supplementary Materials

**Supplementary Table S1.** Phase growth performance of broilers fed with low protein diets during experimentally induced heat stress

| Items                    | Treatments <sup>1</sup> |                    |                   |                    | SEM <sup>2</sup> | <i>p</i> -Values |                   |             |
|--------------------------|-------------------------|--------------------|-------------------|--------------------|------------------|------------------|-------------------|-------------|
|                          | NPTN <sup>2</sup>       | LPTN <sup>2</sup>  | NPHS <sup>2</sup> | LPHS <sup>2</sup>  |                  | Diet             | Temp <sup>2</sup> | Diet × Temp |
|                          |                         |                    |                   |                    |                  |                  |                   |             |
| ADG <sup>3</sup> , g/d   |                         |                    |                   |                    |                  |                  |                   |             |
| Grower                   | 68.0                    | 67.3               | 53.3              | 36.9 <sup>*</sup>  | 1.8              | ≤ 0.01           | ≤ 0.01            | ≤ 0.01      |
| Finisher                 | 84.5                    | 78.7               | 50.8              | 44.7 <sup>#</sup>  | 3.7              | 0.03             | ≤ 0.01            | 0.96        |
| ADFI <sup>3</sup> , g/d  |                         |                    |                   |                    |                  |                  |                   |             |
| Grower                   | 145.7                   | 156.7              | 149.7             | 120.6 <sup>*</sup> | 4.4              | 0.25             | 0.05              | ≤ 0.01      |
| Finisher                 | 198.0                   | 202.8              | 160.7             | 144.8              | 5.5              | 0.46             | ≤ 0.01            | 0.18        |
| ADPI <sup>3</sup> , g/d  |                         |                    |                   |                    |                  |                  |                   |             |
| Grower                   | 28.3                    | 22.1 <sup>*</sup>  | 29.0              | 17.0 <sup>*</sup>  | 1.0              | ≤ 0.01           | 0.09              | 0.02        |
| Finisher                 | 34.1                    | 25.8 <sup>*</sup>  | 27.6              | 18.4 <sup>*</sup>  | 1.1              | ≤ 0.01           | ≤ 0.01            | 0.68        |
| ADWI <sup>3</sup> , mL/d |                         |                    |                   |                    |                  |                  |                   |             |
| Grower                   | 256.0                   | 203.8 <sup>*</sup> | 272.8             | 238.4 <sup>*</sup> | 4.8              | ≤ 0.01           | ≤ 0.01            | 0.03        |
| Finisher                 | 382.8                   | 278.2 <sup>*</sup> | 408.2             | 319.2 <sup>*</sup> | 9.6              | ≤ 0.01           | ≤ 0.01            | 0.33        |
| G:F <sup>3</sup> , g/g   |                         |                    |                   |                    |                  |                  |                   |             |
| Grower                   | 0.4                     | 0.4                | 0.4               | 0.4                | 0.01             | 0.28             | 0.03              | 0.79        |
| Finisher                 | 0.4                     | 0.4 <sup>#</sup>   | 0.3               | 0.3                | 0.01             | 0.04             | ≤ 0.01            | 0.19        |
| G:P <sup>3</sup> , g/g   |                         |                    |                   |                    |                  |                  |                   |             |
| Grower                   | 2.2                     | 2.9 <sup>*</sup>   | 2.0               | 2.5 <sup>*</sup>   | 0.09             | ≤ 0.01           | 0.03              | 0.55        |
| Finisher                 | 2.6                     | 3.2 <sup>*</sup>   | 1.8               | 2.3 <sup>*</sup>   | 0.10             | ≤ 0.01           | ≤ 0.01            | 0.84        |
| W:F <sup>3</sup> , mL/g  |                         |                    |                   |                    |                  |                  |                   |             |
| Grower                   | 1.8                     | 1.4 <sup>*</sup>   | 1.9               | 2.0                | 0.06             | 0.23             | ≤ 0.01            | ≤ 0.01      |
| Finisher                 | 2.0                     | 1.4 <sup>*</sup>   | 2.6               | 2.2 <sup>*</sup>   | 0.09             | ≤ 0.01           | ≤ 0.01            | 0.19        |

<sup>1</sup> The values are the mean; *n*=9 pens (5-6 birds/pen).

<sup>2</sup> NPTN: normal protein diet under thermoneutral; LPTN: low protein diet under thermoneutral; NPHS: normal protein diet under heat stress; LPHS: low protein diet under heat stress; SEM: standard error of means; Temp: temperature.

<sup>3</sup> ADG: average daily gain; ADFI: average daily feed intake; ADPI: average daily protein intake; ADWI: average daily water intake; G:F: gain: feed; G:P: gain: protein; W:F: water: feed. The *p*-Values for the overall model effect for diet, temp, phase, diet × temp, diet × phase, temp × phase and diet × temp × phase for ADG were 0.59, 0.62, 0.05, 0.03, 0.58, 0.84, 0.17, for ADFI were 0.26, ≤ 0.01, ≤ 0.01, 0.02, 0.68, ≤ 0.01, 0.26, for ADPI were ≤ 0.01, ≤ 0.01, ≤ 0.01, 0.11, 0.79, ≤ 0.01, 0.05, for ADWI were ≤ 0.01, ≤ 0.01, ≤ 0.01, 0.11, ≤ 0.01, 0.31, 0.89, for G:F were 0.08, ≤ 0.01, ≤ 0.01, 0.71, 0.92, ≤ 0.01, 0.33 for G:P were ≤ 0.01, ≤ 0.01, 0.66, 0.57, 0.70, ≤ 0.01, 0.64 for W:F were ≤ 0.01, ≤ 0.01, ≤ 0.01, ≤ 0.01, ≤ 0.01, ≤ 0.01 and 0.06.

\* Within rows, NPTN vs LPTN and NPHS vs LPHS *p* ≤ 0.05

# Within rows, NPTN vs LPTN and NPHS vs LPHS 0.05 < *p* ≤ 0.10

**Supplementary Table S2.** Non-significant plasma metabolites in broilers fed with low protein diets during experimentally induced heat stress

| Metabolites                   | Treatments <sup>1</sup> |                   |                   |                   | SEM <sup>2</sup> | <i>p</i> -Values |                   |                          |
|-------------------------------|-------------------------|-------------------|-------------------|-------------------|------------------|------------------|-------------------|--------------------------|
|                               | NPTN <sup>2</sup>       | LPTN <sup>2</sup> | NPHS <sup>2</sup> | LPHS <sup>2</sup> |                  | Diet             | Temp <sup>2</sup> | Diet × Temp <sup>2</sup> |
| Aconitic acid                 | 10961                   | 7194              | 10977             | 6944*             | 641              | 0.24             | 0.71              | 0.15                     |
| Adenosine                     | 554                     | 457               | 1513              | 749               | 175              | 0.38             | 0.06              | 0.19                     |
| Adenosine-5-monophosphate     | 1836                    | 1506              | 1951              | 1420              | 158              | 0.81             | 0.77              | 0.24                     |
| Alloxanoic acid               | 1102                    | 685               | 739               | 737               | 66               | 0.80             | 0.51              | 0.49                     |
| Aminovaleric acid             | 27753                   | 10081             | 6239              | 9171*             | 4320             | 0.72             | 0.18              | 0.29                     |
| Anhydro-D-galactose           | 2743                    | 1977              | 1864              | 2013              | 115              | 0.12             | 0.18              | 0.41                     |
| Arachidonic acid              | 8050                    | 4361              | 4972              | 4339              | 416              | 0.32             | 0.07              | 0.19                     |
| Beta alanine                  | 30291                   | 24373             | 25862             | 22923             | 1952             | 0.59             | 0.73              | 0.60                     |
| Cellobiose                    | 6968                    | 4463              | 5279              | 4829              | 372              | 0.73             | 0.60              | 0.69                     |
| Chlorogenic acid              | 387                     | 286               | 539               | 332               | 55               | 0.59             | 0.38              | 0.36                     |
| Cholesterone                  | 929                     | 489               | 589               | 533               | 50               | 0.54             | 0.32              | 0.32                     |
| Citric acid                   | 1365683                 | 953893            | 1149390           | 819214            | 68579            | 0.75             | 0.17              | 0.19                     |
| Cysteine glycine              | 2208                    | 1692              | 2049              | 1597              | 80               | 0.57             | 0.88              | 0.23                     |
| Deoxy-5-methylthioadenosine   | 1019                    | 674               | 959               | 883               | 53               | 0.67             | 0.25              | 0.93                     |
| Deoxypentitol                 | 4888                    | 3695              | 4574              | 3885              | 206              | 0.45             | 0.60              | 0.57                     |
| Fructose                      | 121412                  | 19170             | 12677             | 18955             | 20703            | 0.29             | 0.17              | 0.20                     |
| Fucose                        | 40990                   | 24241             | 37045             | 28479             | 1662             | 0.17             | 0.18              | 0.95                     |
| Glucose                       | 6775063                 | 3551424           | 5890083           | 4807472           | 309293           | 0.22             | 0.32              | 0.39                     |
| Glutamic acid                 | 661273                  | 430980            | 798974            | 514513            | 46183            | 0.34             | 0.08              | 0.32                     |
| Glyceric acid                 | 57758                   | 49405*            | 55774             | 46473             | 2486             | 0.24             | 0.66              | 0.09                     |
| Glycolic acid                 | 25366                   | 19062             | 20280             | 16428             | 879              | 0.54             | 0.07              | 0.22                     |
| Guanosine                     | 1433                    | 774               | 989               | 1412              | 133              | 0.31             | 0.36              | 0.12                     |
| Hydroxybutanoic acid          | 171810                  | 114226            | 149515            | 95181             | 12021            | 0.44             | 0.46              | 0.49                     |
| Hydroxycarbamate              | 3143                    | 2602              | 2155              | 2434              | 161              | 0.07             | 0.17              | 0.97                     |
| Hydroxy-3-methylglutaric acid | 1608                    | 986               | 1040              | 993               | 74               | 0.82             | 0.08              | 0.30                     |
| Hydroxyphenylacetic acid      | 1652                    | 1031              | 1011              | 982               | 81               | 0.74             | 0.06              | 0.47                     |

|                              |         |                   |         |         |        |        |      |      |
|------------------------------|---------|-------------------|---------|---------|--------|--------|------|------|
| Hydroxyphenyl propionic acid | 3994    | 1855              | 1916    | 1291    | 362    | 0.25   | 0.06 | 0.58 |
| Hydroxypropionic acid        | 41671   | 25135             | 30334   | 27577   | 1791   | 0.91   | 0.43 | 0.52 |
| Indole-3-acetate             | 5263    | 8257*             | 4962    | 9756    | 1094   | ≤ 0.01 | 0.78 | 0.96 |
| Indole-3-lactate             | 3608    | 3801              | 3209    | 2540    | 294    | 0.28   | 0.22 | 0.12 |
| Isocitric acid               | 49960   | 29311             | 37732   | 29183   | 2566   | 0.31   | 0.24 | 0.89 |
| Inosine-5-monophosphate      | 1964    | 883 <sup>#</sup>  | 1721    | 1702    | 158    | 0.70   | 0.10 | 0.16 |
| Lactic acid                  | 4913087 | 3014734           | 4598820 | 3418810 | 322820 | 0.64   | 0.58 | 0.81 |
| Maleic acid                  | 1982    | 1379              | 2136    | 1345    | 110    | 0.45   | 0.36 | 0.21 |
| Mannose                      | 175608  | 84619             | 155980  | 117915  | 11786  | 0.28   | 0.34 | 0.54 |
| Methyl-O-D-galactopyranoside | 8834    | 5384              | 8560    | 7829    | 490    | 0.97   | 0.09 | 0.51 |
| Myoinositol                  | 435208  | 435208*           | 723105  | 608941  | 38954  | 0.20   | 0.22 | 0.17 |
| N-acetylaspartic acid        | 7102    | 4839              | 6317    | 5656    | 448    | 0.78   | 0.63 | 1.00 |
| N-acetylornithine            | 14447   | 9827              | 14836   | 14101   | 887    | 0.68   | 0.10 | 0.55 |
| Nicotinic acid               | 1966    | 5647*             | 5577    | 5213    | 2336   | 0.23   | 0.10 | 0.26 |
| Oxalic acid                  | 103175  | 68793             | 64218   | 61229   | 6617   | 0.78   | 0.16 | 0.79 |
| Pantothenic acid             | 5718    | 3054              | 4274    | 3734    | 333    | 0.56   | 0.96 | 0.32 |
| Pentose                      | 7030    | 5112              | 6071    | 5563    | 395    | 0.47   | 0.82 | 0.87 |
| Phenylalanine                | 604111  | 375028            | 549289  | 392191  | 22022  | 0.14   | 0.68 | 0.50 |
| Phenylethylamine             | 195180  | 129800            | 114912  | 147009* | 11349  | 0.24   | 0.26 | 0.23 |
| Phenyllactic acid            | 4071    | 1404              | 2752    | 1404*   | 354    | 0.19   | 0.09 | 0.54 |
| Phosphate                    | 2673412 | 1835797           | 1980977 | 1838620 | 80122  | 0.28   | 0.08 | 0.67 |
| Phosphoglycerate             | 2218    | 1445              | 1229    | 1548    | 153    | 0.34   | 0.26 | 0.30 |
| Picolinic acid               | 1964    | 1602 <sup>#</sup> | 1041    | 1805*   | 214    | 0.53   | 0.06 | 0.86 |
| Putrescine                   | 16802   | 8579              | 27303   | 19258   | 3801   | 0.56   | 0.12 | 0.88 |
| Quinolinic acid              | 754     | 679               | 970     | 708     | 42     | 0.55   | 0.18 | 0.15 |
| Shikimic acid                | 17727   | 7809*             | 17286   | 14991   | 1344   | 0.29   | 0.06 | 0.28 |
| Thymine                      | 1573    | 923               | 1052    | 1127    | 73     | 0.71   | 0.78 | 0.08 |
| Xanthosine                   | 805     | 518               | 1309    | 837     | 97     | 0.71   | 0.78 | 0.08 |
| Xylonic acid                 | 1559    | 918               | 1359    | 1013    | 84     | 0.24   | 0.72 | 0.81 |
| Xylulose                     | 19029   | 4141 <sup>#</sup> | 6905    | 5324    | 500    | 0.08   | 0.61 | 0.32 |

<sup>1</sup>The values are the mean peak height; *n*=8 per treatment

<sup>2</sup>NPTN: normal protein diet under thermoneutral; LPTN: low protein diet under thermoneutral; NPHS: normal protein diet under heat stress; LPHS: low protein diet under heat stress; SEM: standard error of means; Temp: temperature.

\*Within rows, NPTN vs LPTN and NPHS vs LPHS *p* ≤ 0.05

# Within rows, NPTN vs LPTN and NPHS vs LPHS  $0.05 < p \leq 0.10$

**Supplementary Table S3.** Quantitative PCR (qPCR) primer sequences, location on template, length, and GenBank accession number used in this study

| Genes <sup>1</sup> | Sequence (5' → 3')                                  | GenBank accession No. | Location on template (bp) | Amplicon length |
|--------------------|-----------------------------------------------------|-----------------------|---------------------------|-----------------|
| Ghrelin            | F-CCTTGGGACAGAACTGCTC<br>R- CACCAATTTCAAAAGGAACG    | NM_001001131.1        | 199-218<br>382-401        | 203             |
| CCK                | F-CAGCAGAGCCTGACAGAACC<br>R-AGAGAACCTCCCAGTGGAACC   | NM_001001741.1        | 162-181<br>309-329        | 168             |
| PYY                | F-AGGAGATCGCGCAGTACTTCTC<br>R-TGCTGCGCTTCCCATAACC   | NM_001361182.1        | 144-166<br>205-222        | 78              |
| Secretin           | F-TGAGTTGGCTGAGAGTACAG<br>R-CTTCACATCTGTCACCAGCT    | NM_001024833.2        | 3-22<br>570-589           | 587             |
| GIP                | F-CGCAGTGAGTGACCAAAGC<br>R-TAGGAGCCATGCAAGGAAGT     | NM_001080104.1        | 366-384<br>413-432        | 67              |
| β1-AR              | F-CTGGCACCTAGCACAATGAA<br>R-CTGCTTGCTGATCCACATCT    | NM_205518.1           | 1026-1045<br>1129-1148    | 123             |
| PGC-1α             | F-GGGACCGGTTTGAAGTTTTTG<br>R-GGCTCGTTTGACCTGCGTAA   | NM_001006457.1        | 2072-2092<br>2203-2222    | 151             |
| AMPKα1             | F-ATCTGTCTCGCCCTCATCCT<br>R-CCACTTCGCTCTTCTTACACCTT | NM_001039603.1        | 1337-1356<br>1439-1461    | 125             |
| β -Actin           | F-CAATGGCTCCGGTATGTGCA<br>R- AGGCATACAGGGACAGCACA   | NM_205518.1           | 101-120<br>482-501        | 401             |
| Sirtuin 1          | F-GATCAGCAAAAGGCTGGATGGT<br>R-ACGAGCCGCTTTCGCTACTAC | NM_001004767.1        | 1932-1953<br>2054-2074    | 143             |
| Cox IV             | F-CTTTCCACCTCCATCTGTGTGA<br>R-TGCTGGATGGCTGAAATCG   | NM_001030577.1        | 83-104<br>139-157         | 75              |

<sup>1</sup>CCK: cholecystokinin, PYY: peptide YY, GIP: gastric inhibitory polypeptide, β1-AR: β1-adrenergic receptor, PGC-1α: peroxisome proliferator-activated receptor-gamma coactivator, AMPKα1: AMP-activated protein kinase α1, β-Actin: beta actin, Cox IV: cytochrome c oxidase subunit IV

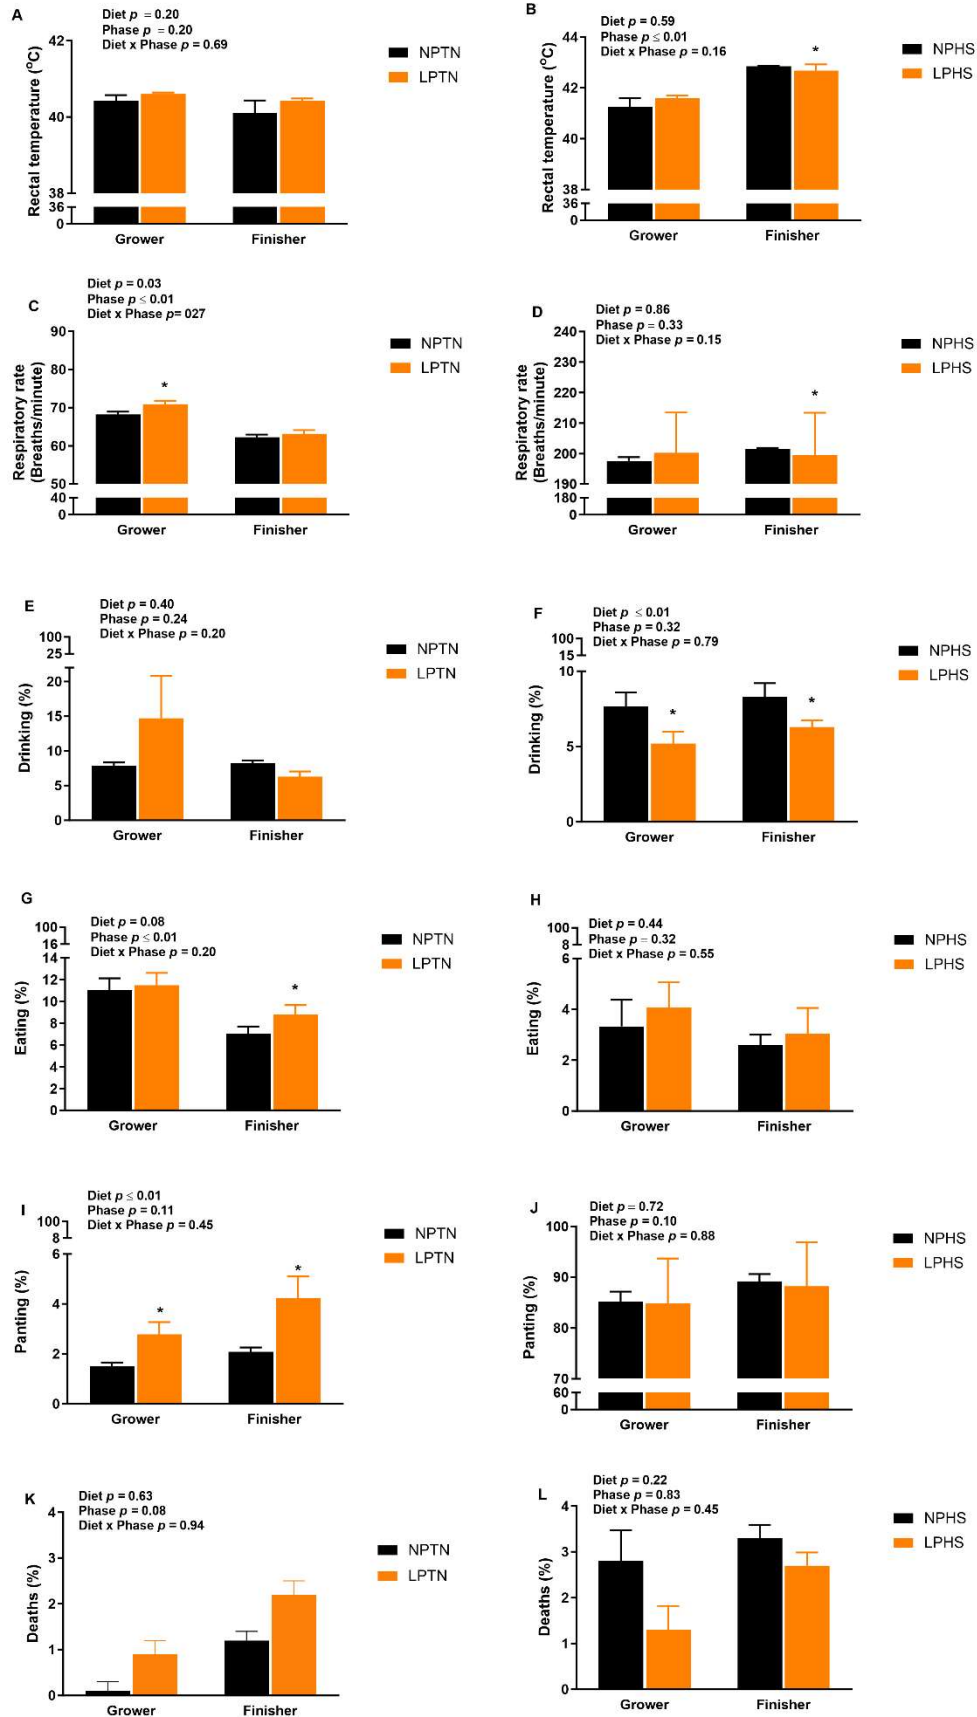

**Supplementary Figure S1. Behavioral adaptations of broilers fed with low protein diets during experimentally induced heat stress**

Effect of low protein diets on rectal temperature (A and B), respiratory rate (C and D), percent of birds drinking (E and F), percent of birds eating (G and H), percent of birds panting (I and J) and percent death (K and L) in broilers during thermoneutral (TN) (A, C, E, G, I and K) and heat stress (HS) (B, D, F, H, J and L). NPTN: normal protein diet under thermoneutral; LPTN: low protein diet under thermoneutral; NPHS: normal protein diet under heat stress; LPHS: low protein diet under heat stress. The *p*-Values for the overall model effects of diet, temp, time, diet  $\times$  temp, diet  $\times$  time, time  $\times$  temp, diet  $\times$  temp  $\times$  time for rectal temperature were 0.19,  $\leq 0.01$ ,  $\leq 0.01$ , 0.55, 0.47,  $\leq 0.01$ , 0.20, for respiratory rate were 0.34,  $\leq 0.01$ ,  $\leq 0.01$ , 0.52, 0.07,  $\leq 0.01$  and 0.44, for percent of birds drinking were 0.93, 0.09, 0.33, 0.10, 0.20, 0.14, and 0.16, for percent of birds eating were 0.13,  $\leq 0.01$ ,  $\leq 0.01$ , 0.64, 0.71, 0.08 and 0.56, for percent of birds panting were 0.61,  $\leq 0.01$ , 0.05, 0.24, 0.95, 0.26 and 0.74 and percent death were 0.47, 0.56, 0.66, 0.22, 0.53, 0.94, and 0.50. The values are the mean  $\pm$  SEM;  $n=9$  pens (5-6 birds/pen).

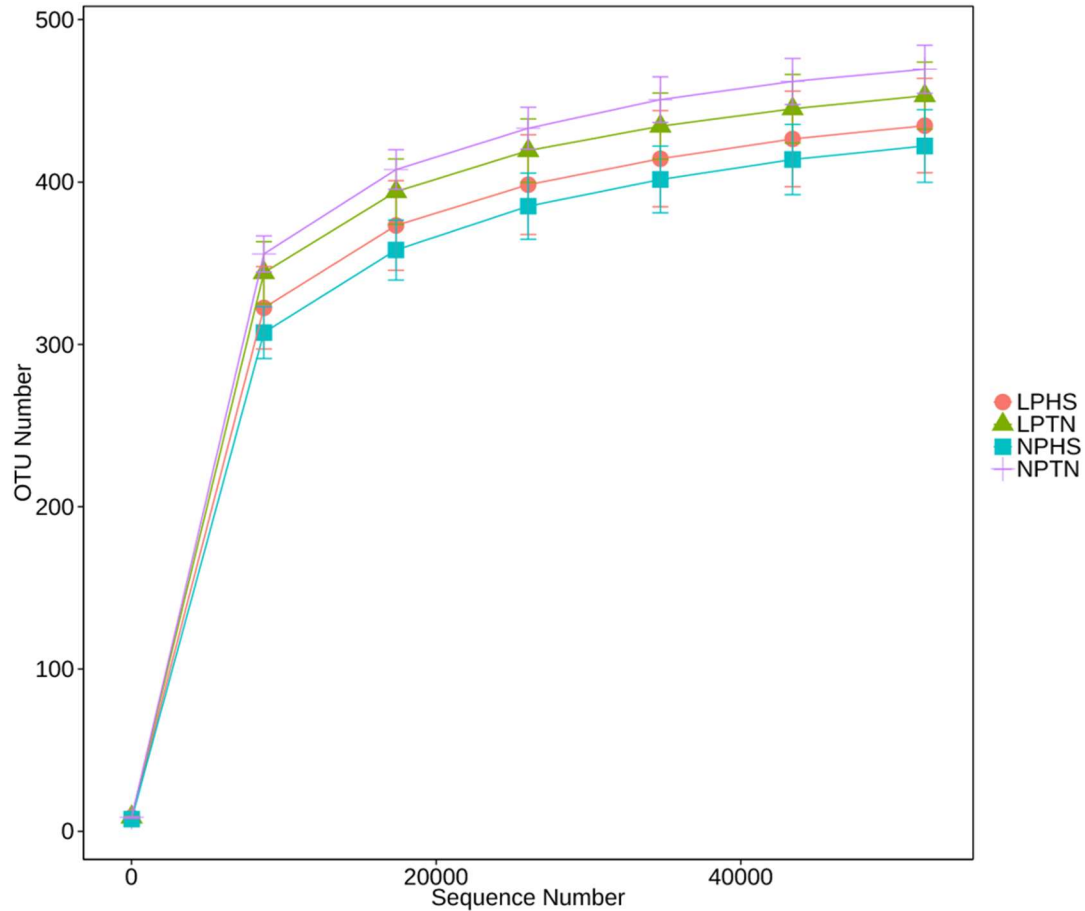

**Supplementary Figure S2. Cecal rarefaction curve analysis for broilers fed with low protein diets during experimentally induced heat stress**

The rarefaction curves from cecal samples represent the number of operational taxonomic units (OTU) as a function of the number of reads sampled. NPTN: normal protein diet under thermoneutral; LPTN: low protein diet under thermoneutral; NPHS: normal protein diet under heat stress; LPHS: low protein diet under heat stress.  $n=6$  for each treatment.



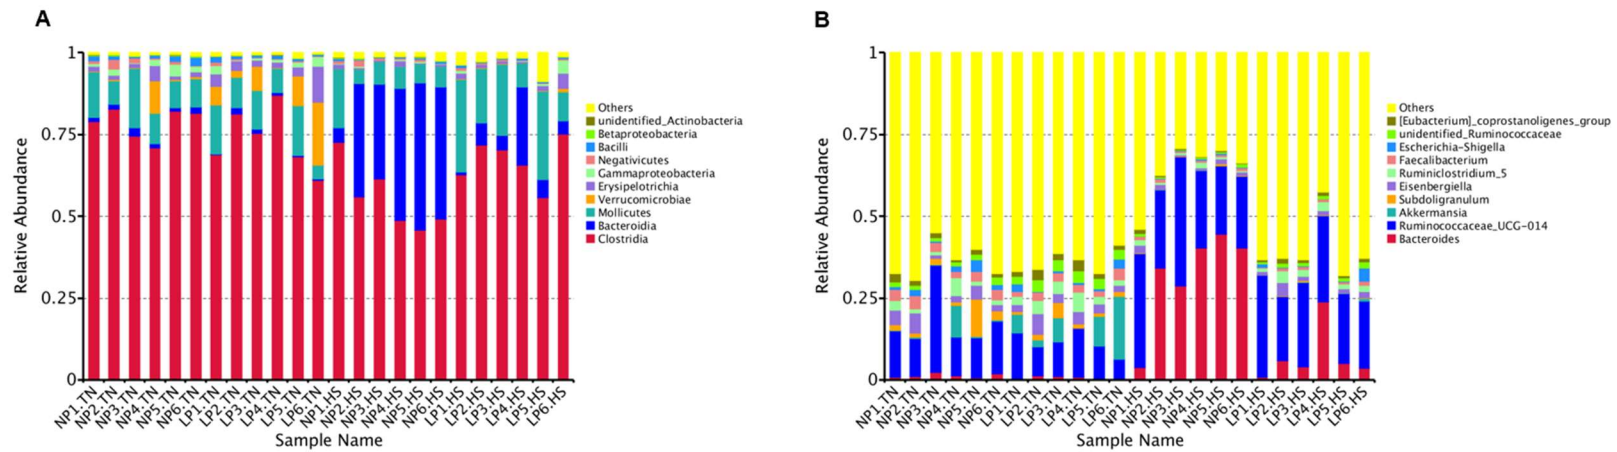

**Supplementary Figure S3. The composition of cecal bacterial populations in broilers fed with low protein diets during experimentally induced heat stress**

The relative abundance of bacterial community composition in cecal samples of individual pigs at phylum level (A) and at genus level (B). NPTN: normal protein diet under thermoneutral; LPTN: low protein diet under thermoneutral; NP HS: normal protein diet under heat stress; LPHS: low protein diet under heat stress. For clarity reasons, only the top 10 phyla and genera are shown.  $n=6$  for each treatment.

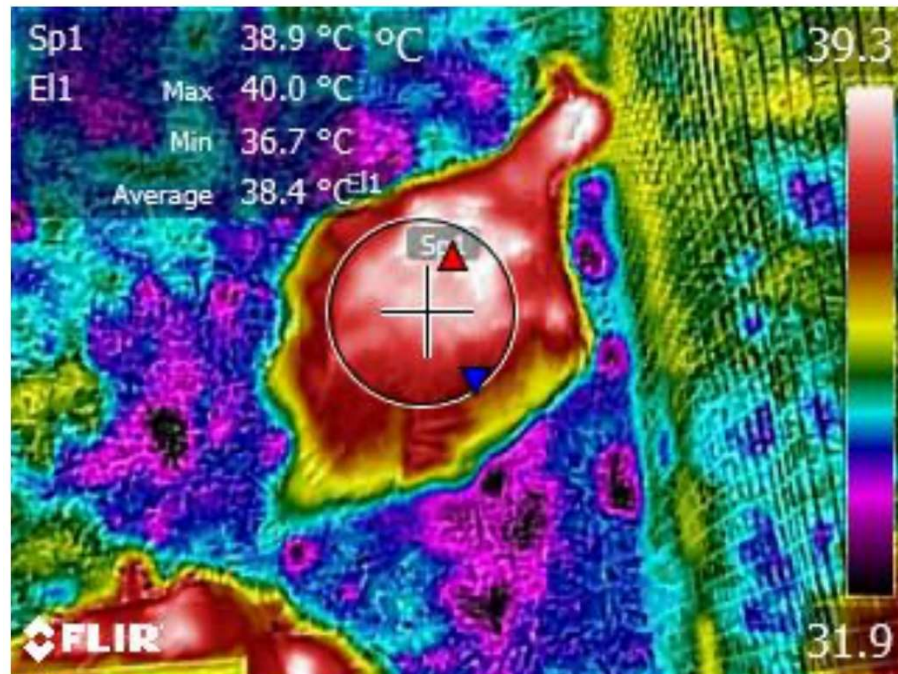

**Supplementary Figure S4. A representative screenshot of a thermal image from FLIR Research Studio.**

The region of interest was determined by drawing a circle in the back of birds. The mean temperature data from the region of interest were extracted from birds fed with normal protein and low protein diets at different time points during thermoneutral and heat stress periods and used for data analysis. FLIR Research Studio (version 5.13.18031.2002).
